# Supplementary material for: Identifying and Predicting Cognitive Decline Using Multi-Modal Sensor Data and Machine Learning Approach
Source: Research Square preprint supplement (doi:10.21203/rs.3.rs-6735622/v1), 2025-06-18
Supplement: Supplementary file 1 [file 637821bbcf5227f91c1ba9ba.docx]

| **Table 1** Multi-Dimensional Data Features and Their Description | | | |
| --- | --- | --- | --- |
| **Feature Type** | **Feature Name** | **Code** | **Description** |
| **Cognitive Status** | MCI/Alzheimer’s | CI | Participants diagnosed with MCI or Alzheimer’s disease |
| Healthy Aging | HA | Participants with no cognitive impairment, representing healthy aging |
| **Driving Life-Space** | Total Miles Driven | Tot_Miles | Total number of miles driven in week |
| Total no. of Trips | Tot_Trips | Total number of trips in week |
| Average Miles per trip | Avg_Miles_Trip | Total number of miles driven in week divided by total number of trips in week |
| Average Minute per trip | Avg_Min_Trip | Total driving minutes in week divided by total number of trips in week |
| Total trip minutes | Tot_Trip_Min | Total minutes of driving in week |
| No. trips during day | Day_Trips | Number of trips in week not classified as nighttime (9PM to 6AM) |
| % trips during day | Pct_Day_Trips | Percent of trips in week not classified as nighttime (9PM to 6AM) |
| No. trips in AM peak | AM_Peak_Trips | Number of trips in week during 7–9 AM on weekdays |
| % trips in AM peak | Pct_AM_Peak_Trips | Percent of trips in week during 7–9 AM on weekdays |
| No. trips at night | Night_Trips | The number of trips, during which at least 80% of a trip was during nighttime (9PM to 6AM) in week |
| % trips at night | Pct_Night_Trips | Percent of trips, during which at least 80% of a trip was during nighttime (9PM to 6AM) in week |
| No. trips in PM peak | PM_Peak_Trips | Number of trips in week during 4–6PM on weekdays |
| % trips in PM peak | Pct_PM_Peak_Trips | Percent of trips in week during 4–6PM on weekdays |
| No. trips < 15 miles of home | Trips_LT_15_Miles | The number of trips in a week where distance traveled is within 15 miles of home |
| No. trips < 25 miles of home | Trips_LT_25_Miles | The percentage of trips in a week where distance traveled is within 15 miles of home |
| % trip < 25 miles of home | Pct_LT_25_Miles | The number of trips in a week where distance traveled is within 25 miles of home |
| Trip chains | Trip_Chains | The percentage of trips in a week where distance traveled is within 25 miles of home |
| Miles per chain | Miles_per_Chain | Number of trip chains in week (Note: chain is a series of trips starting and ending at home) |
| Minutes per chain | Min_per_Chain | Total miles of chains in week divided by total number of trip chains in week |
| Weekend Errand Trips | Weekend_Errands | Total driving minutes for chains divided by total number of trip chains in week |
|  |  |  |  |
| **Driving Performance** | No. trips on high-speed roads | HighSpeed_Trips | The number of trips in week where 20% of distance travelled was at a speed of 60 mph or greater |
| % trip on high-speed roads | Pct_HighSpeed_Trips | The percentage of trips in week where 20% of distance travelled was at a speed of 60 mph or greater |
| Average acceleration | Avg_Acceleration | The average acceleration of trips in a week |
| Average speed | Avg_Speed | The average speed of trips in a week |
| No. hard braking events with deceleration rates <= -0.35 g | Hard_Brakes | Number of events with a deceleration rate <= -0.35 g in a week |
| Probability of stopping at stop sign | Stop_Sign_Prob | The percentage of times the driver stopped at stop intersections in a week |
|  |  |  |  |
| **Sleep Metrics** | Mean Sleep Efficiency | Mean_SE | Number of sleep minutes divided by the total number of minutes the driver was in bed for each day, aggregated over every week |
| Mean Awakening Duration | Mean_Awakenings_Min | The average length, in minutes, of all awakening episodes for each day, aggregated over every week |
| Mean Wake After Sleep Onset | Mean_WASO_Min | The total number of minutes that the driver was awake after sleep onset occurred for each day, aggregated over every week |
